# Supplementary material for: Atomistic insights into the morphological dynamics of gold and platinum nanoparticles: MD simulations in vacuum and aqueous media
Source: publisher site journal article supplement (doi:10.3762/bjnano.15.81), 2024-08-07
Supplement: Additional file 1 [file 2190-4286-15-81-S1.pdf]

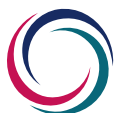

## Supporting Information

for

### **Atomistic insights into the morphological dynamics of gold and platinum nanoparticles: MD simulations in vacuum and aqueous media**

Evangelos Voyiatzis, Eugenia Valsami-Jones and Antreas Afantitis

*Beilstein J. Nanotechnol.* **2024**, *15*, 995–1009. [doi:10.3762/bjnano.15.81](https://doi.org/10.3762/bjnano.15.81)

## Additional figures

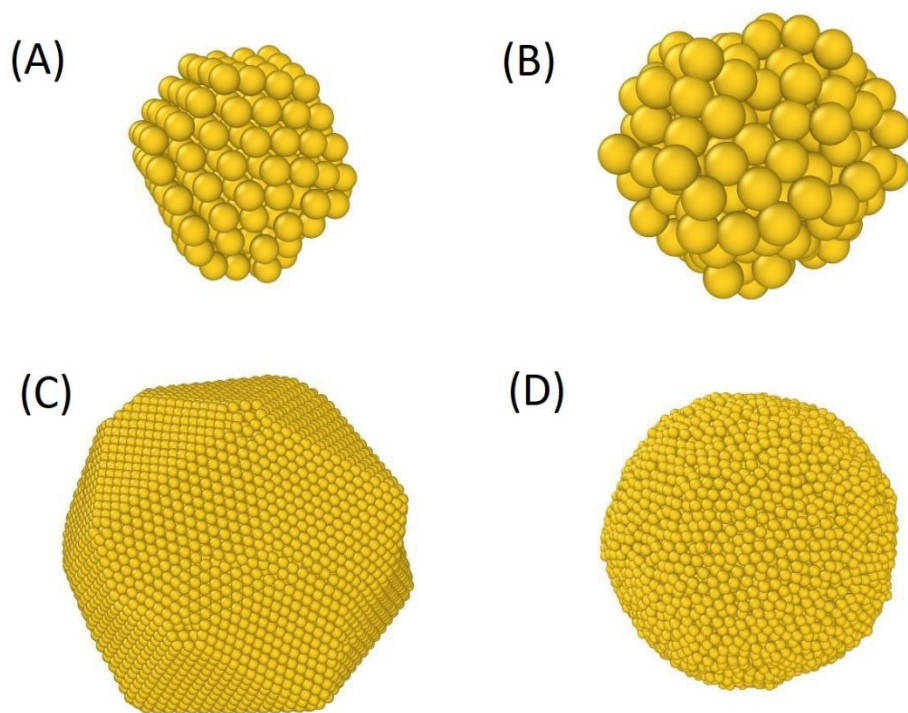

**Figure S1:** Visualization of Au NPs with diameters of 2 nm (panels A and B) and 8 nm (panels C and D) at 100 K (panels A and C) and 1100 K (panels B and D).

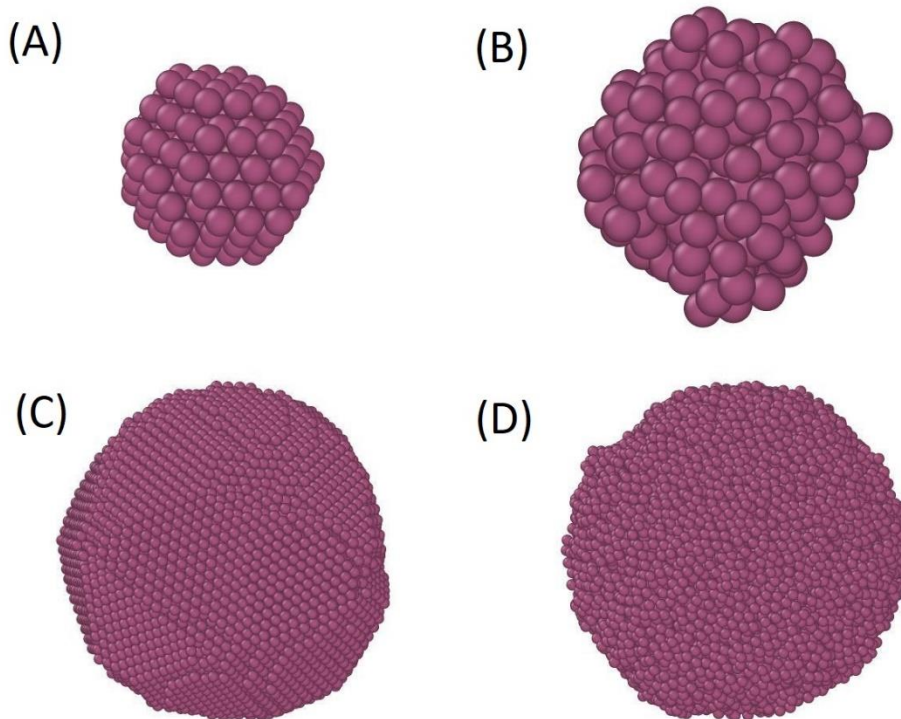

**Figure S2:** Visualization of Pt NPs with diameters of 2 nm (panels A and B) and 8 nm (panels C and D) at 100 K (panels A and C) and 2000 K (panels B and D).

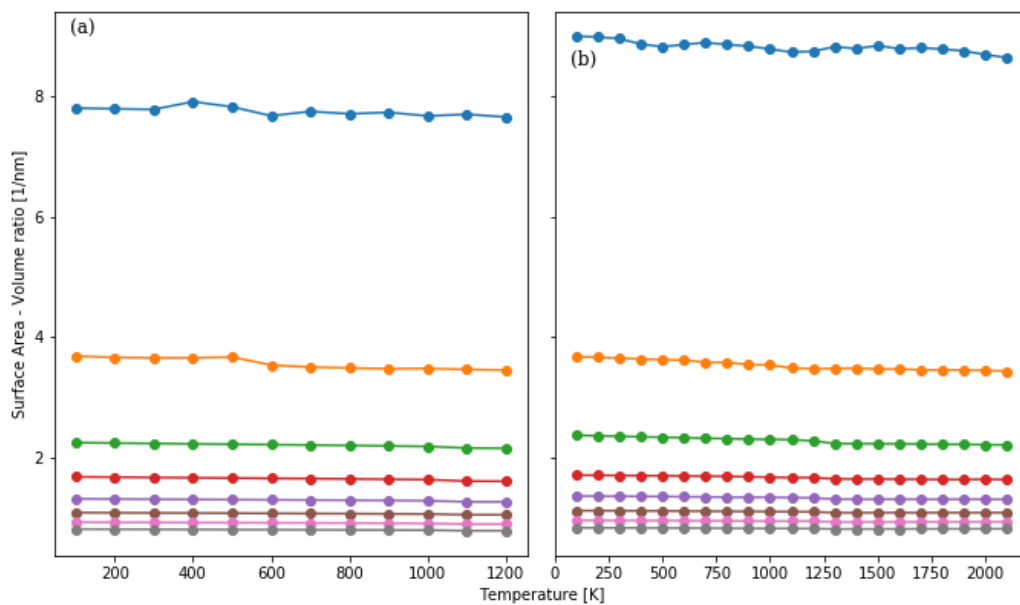

**Figure S3:** Temperature dependence of surface area to volume ratio for Au (panel a) and Pt (panel b) NPs. The NP diameters range from 1 nm to 8 nm. The symbols for the NP diameters are explained in Figure S4.

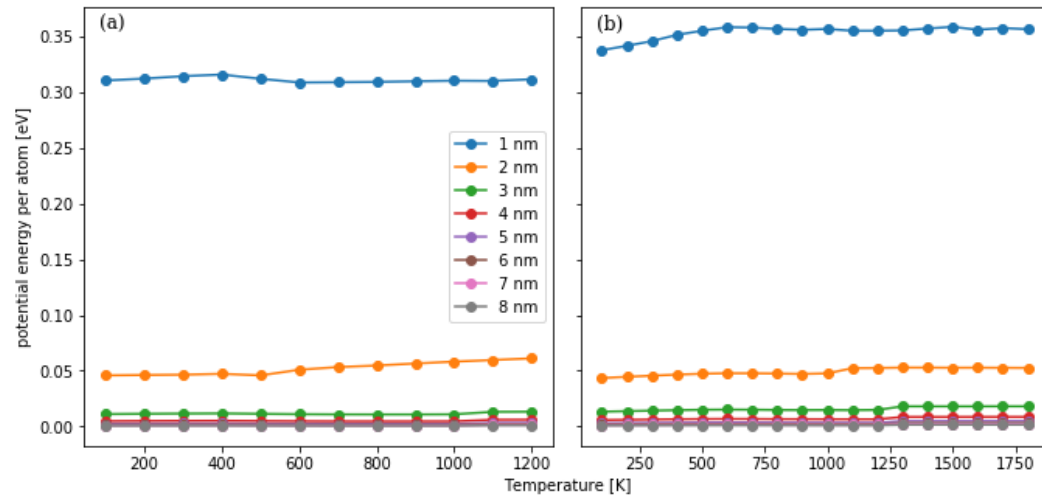

**Figure S4:** Temperature dependence of the average surface potential energy per atom for Au (panel a) and Pt (panel b) NPs. The NP diameters range from 1 up to 8 nm.
